# Supplementary material for: Understanding the photophysical properties of chiral dinuclear Re(i) complexes and the role of Re(i) in their complexes
Source: Royal Society of Chemistry journal article supplement (doi:10.1039/c6dt00089d), 2016-01-01
Supplement: c6dt00089d1.pdf [file c6dt00089d1.pdf]

# Understanding the Photophysical Properties of Chiral Dinuclear Re(I) Complexes and the Role of Re(I) in Their Complexes

Chunyu Liu,<sup>a</sup> Yanling Si,<sup>b</sup> Shaoqing Shi,<sup>a</sup> Guochun Yang<sup>a,\*</sup> and Xiumei Pan<sup>a,\*</sup>

- a. Institute of Functional Material Chemistry, Faculty of Chemistry, Northeast Normal University, Changchun 130024 Jilin, China.  
E-mail: yanggc468@nenu.edu.cn
- b. College of Resource and Environmental Science, Jilin Agricultural University, Changchun, 130118 Jilin, China

# Contents

|                                                                                                                                                                                                       |            |
|-------------------------------------------------------------------------------------------------------------------------------------------------------------------------------------------------------|------------|
| 1. Optimized molecular structure and atomic label of complex <b>2</b> .                                                                                                                               | <b>S4</b>  |
| 2. The main concerned bond lengths and bond angles for complex <b>2</b> between experiment and calculation.                                                                                           | <b>S5</b>  |
| 3. Selected calculated IR vibrational frequencies ( $\text{cm}^{-1}$ ) along with the experimental data (in parentheses) of complex <b>2</b> .                                                        | <b>S6</b>  |
| 4. The calculated IR spectra of complex <b>2</b> at B3LYP/BSI level along with the experimental data (labeled as red).                                                                                | <b>S6</b>  |
| 5. The selected atomic labels of complexes <b>2</b> , <b>3</b> and <b>8</b> .                                                                                                                         | <b>S7</b>  |
| 6. The binding energies ( $\Delta E$ ) (kcal/mol) for complexes <b>2</b> , <b>3</b> and <b>8</b> .                                                                                                    | <b>S8</b>  |
| 7. Second order perturbation interactions that contribute mainly to the ground state stabilization for complexes <b>2</b> , <b>3</b> and <b>8</b> from NBO analysis performed at the B3LYP/BSI level. | <b>S9</b>  |
| 8. Frontier molecular orbital compositions (%) in the ground state for complex <b>2</b> at the B3LYP/BSII level.                                                                                      | <b>S10</b> |
| 9. Frontier molecular orbital compositions (%) in the ground state for complex <b>3</b> at the B3LYP/BSII level.                                                                                      | <b>S11</b> |
| 10. Frontier molecular orbital compositions (%) in the ground state for complex <b>6</b> at the B3LYP/BSII level.                                                                                     | <b>S12</b> |
| 11. Frontier molecular orbital compositions (%) in the ground state for complex <b>7</b> at the B3LYP/BSII level.                                                                                     | <b>S13</b> |
| 12. Calculated UV-Vis and CD spectra of complex <b>2</b> using four different DFT functionals along with the experimental spectra in solution phase.                                                  | <b>S14</b> |
| 13. Calculated UV-Vis (left) and CD (right) spectra in both gas and solution phases for complex <b>2</b> .                                                                                            | <b>S15</b> |
| 14. The calculated excitation energies, oscillator strengths and rotational strengths for complex <b>2</b> in the solution phase at the TDB3LYP/BSII level.                                           | <b>S16</b> |
| 15. Computed energies/wavelengths (nm), oscillator strengths ( $f$ ), major contribution                                                                                                              |            |

- and the assignments for complexes **3-9** at TDB3LYP/ BSII level. **S18**
- 16.** Calculated UV–Vis (left) and CD (right) spectra in the solution phase for complexes **3, 5** and **8**. **S19**
- 17.** Molecular orbital isosurfaces involved in the main electron transitions of complexes **3-9**. **S20**
- 18.** Molecular orbitals involved into the main CD transition of complexes ligand **1**, complexes **2-9**. **S23**

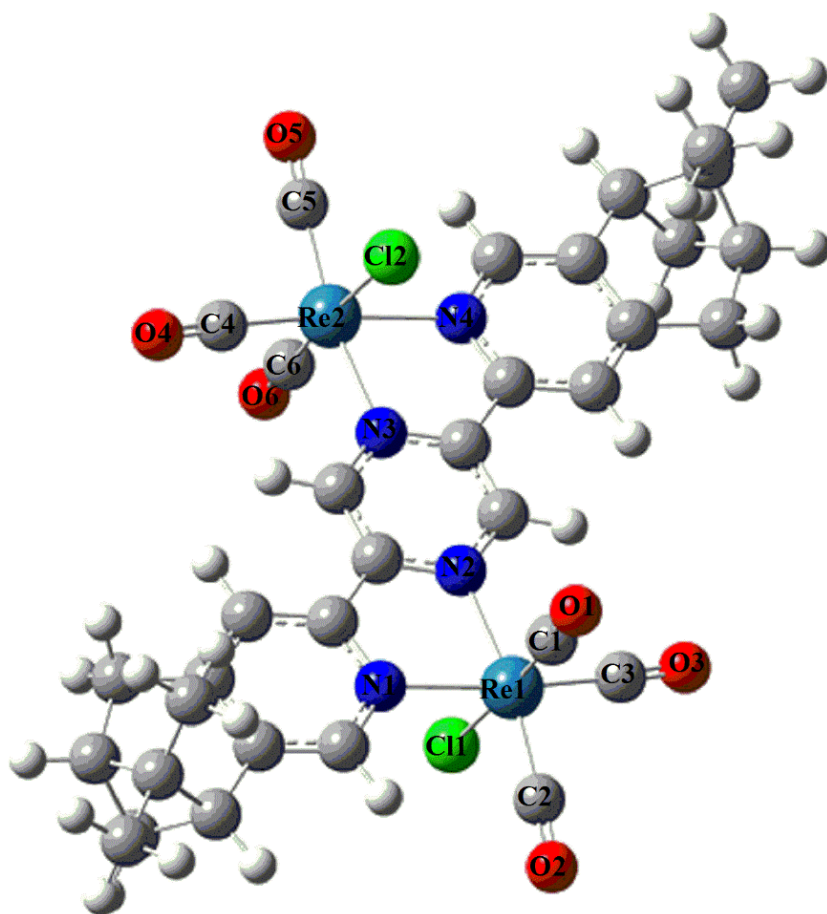

**Fig S1.** Optimized molecular structure and atomic label of complex 2.

**Table S1.** The main concerned bond lengths and bond angles for complex **2** between experiment and calculation.

| experimental    |       |                 |       |                 |       |
|-----------------|-------|-----------------|-------|-----------------|-------|
| Re(1)-N(1)      | 2.168 | Re(1)-N(2)      | 2.145 | Re(2)-N(3)      | 2.150 |
| Re(2)-N(4)      | 2.147 | Re(1)-C(1)      | 2.236 | Re(1)-C(2)      | 1.93  |
| Re(1)-C(3)      | 1.91  | Re(2)-C(4)      | 1.87  | Re(2)-C(5)      | 1.83  |
| Re(2)-C(6)      | 1.93  | Re(1)-Cl(1)     | 2.402 | Re(2)-Cl(2)     | 2.420 |
| N(2)-Re(1)-N(1) | 74.9  | N(4)-Re(2)-N(3) | 74.5  | C(2)-Re(1)-N(1) | 99.7  |
| C(1)-Re(1)-N(2) | 83.8  | N(3)-Re(2)-C(4) | 99.9  | N(4)-Re(2)-C(6) | 93.2  |
| theoretical     |       |                 |       |                 |       |
| Re(1)-N(1)      | 2.207 | Re(1)-N(2)      | 2.194 | Re(2)-N(3)      | 2.194 |
| Re(2)-N(4)      | 2.207 | Re(1)-C(1)      | 1.917 | Re(1)-C(2)      | 1.93  |
| Re(1)-C(3)      | 1.93  | Re(2)-C(4)      | 1.93  | Re(2)-C(5)      | 1.93  |
| Re(2)-C(6)      | 1.92  | Re(1)-Cl(1)     | 2.550 | Re(2)-Cl(2)     | 2.550 |
| N(2)-Re(1)-N(1) | 74.5  | N(4)-Re(2)-N(3) | 74.5  | C(2)-Re(1)-N(1) | 97.7  |
| C(1)-Re(1)-N(2) | 93.6  | N(3)-Re(2)-C(4) | 97.55 | N(4)-Re(2)-C(6) | 93.0  |

**Table S2.** Selected calculated IR vibrational frequencies ( $\text{cm}^{-1}$ ) along with the experimental data (in parentheses) of complex **2**.

| vibrational frequencies | Vibrational assignment                      |
|-------------------------|---------------------------------------------|
| 1934(1907)              | $\nu_{\text{asym}}(\text{C}\equiv\text{O})$ |
| 2002(2019)              | $\nu_{\text{sym}}(\text{C}\equiv\text{O})$  |

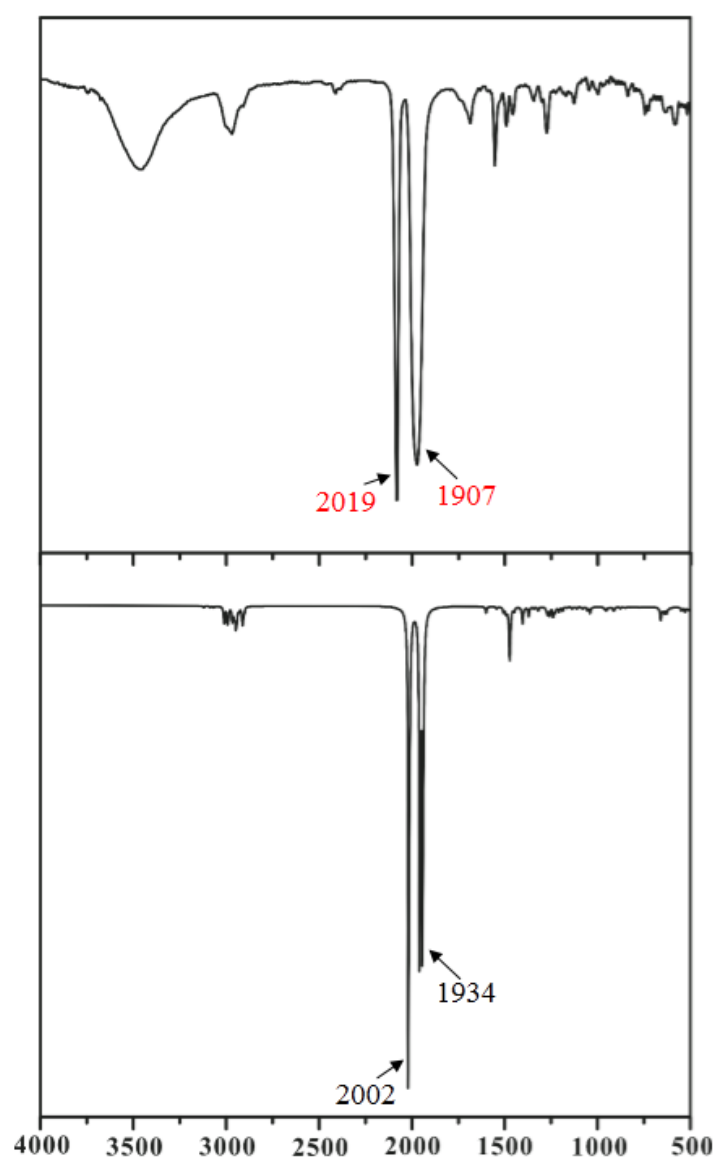

**Figure S2.** The calculated IR spectra of complex **2** at B3LYP/BSI level along with the experimental data (labeled as red). The experimental data can be found in ref.34.

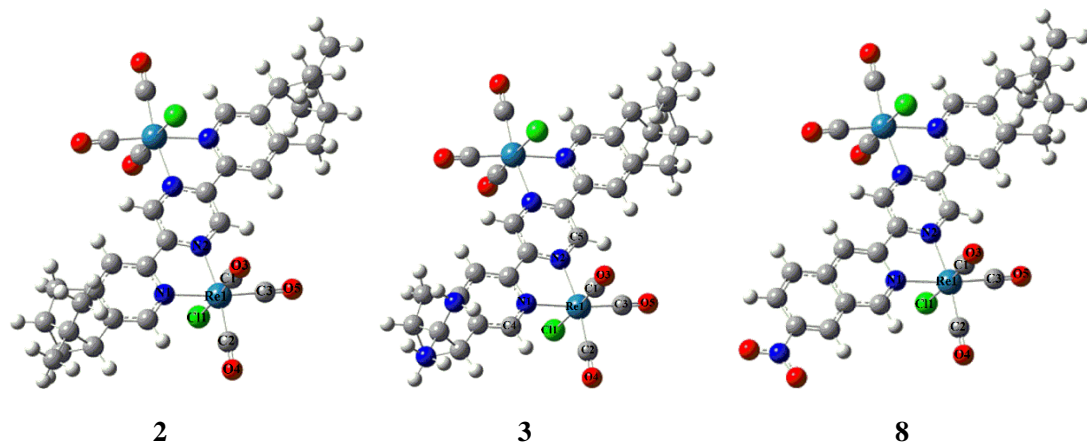

**Figure S3.** The selected atomic labels of complexes **2**, **3** and **8**.

**Table S3.** The binding energies ( $\Delta E$ ) (kcal/mol) for complexes **2**, **3** and **8**.

| Complex  | $\Delta E$ |
|----------|------------|
| <b>2</b> | -47        |
| <b>3</b> | -48        |
| <b>8</b> | -44        |



**Table S4.** Second order perturbation interactions that contribute mainly to the ground state stabilization for complexes **2**, **3** and **8** from NBO analysis performed at the B3LYP/BSI level.

| Complex  | Donor (i) | Acceptor(j)              | $E(2)(\text{kcalmol}^{-1})$ | $E(j)-E(i)$ a.u | $F(i, j)$ a.u |
|----------|-----------|--------------------------|-----------------------------|-----------------|---------------|
| <b>2</b> | n Re(1)   | $\sigma^*$ Re(1) – Cl(1) | 15.44                       | 0.39            | 0.077         |
|          | n Re(1)   | $\sigma^*$ Re(1) – N(1)  | 110.03                      | 0.12            | 0.126         |
|          | n Re(1)   | $\sigma^*$ Re(1) – N(2)  | 28.33                       | 0.25            | 0.082         |
|          | n Re(1)   | $\sigma^*$ Re(1) – C(1)  | 14.32                       | 0.55            | 0.089         |
|          | n Re(1)   | $\sigma^*$ Re(1) – C(2)  | 54.26                       | 0.34            | 0.152         |
|          | n Re(1)   | $\sigma^*$ Re(1) – C(3)  | 60.08                       | 0.33            | 0.160         |
| <b>3</b> | n Re(1)   | $\sigma^*$ Re(1) – Cl(1) | 4.80                        | 0.39            | 0.073         |
|          | n Re(1)   | $\sigma^*$ N(1) – C(4)   | 1.09                        | 0.60            | 0.027         |
|          | n Re(1)   | $\sigma^*$ N(2) – C(5)   | 1.23                        | 0.60            | 0.029         |
|          | n Re(1)   | $\sigma^*$ Re(1) – C(1)  | 29.12                       | 0.48            | 0.121         |
|          | n Re(1)   | $\sigma^*$ Re(1) – C(2)  | 64.25                       | 0.43            | 0.165         |
|          | n Re(1)   | $\sigma^*$ Re(1) – C(3)  | 67.80                       | 0.43            | 0.169         |
| <b>8</b> | n Re(1)   | $\sigma^*$ Re(1) – Cl(1) | 17.42                       | 0.39            | 0.081         |
|          | n Re(1)   | $\sigma^*$ Re(1) – N(1)  | 109.45                      | 0.12            | 0.124         |
|          | n Re(1)   | $\sigma^*$ Re(1) – N(2)  | 100.61                      | 0.12            | 0.120         |
|          | n Re(1)   | $\sigma^*$ Re(1) – C(1)  | 15.68                       | 0.54            | 0.093         |
|          | n Re(1)   | $\sigma^*$ Re(1) – C(2)  | 56.67                       | 0.33            | 0.155         |
|          | n Re(1)   | $\sigma^*$ Re(1) – C(3)  | 59.53                       | 0.34            | 0.159         |

**Table S5.** Frontier molecular orbital compositions (%) in the ground state for complex **2** at the B3LYP/BSII (BSIII for metal Re) level.

| Orbital                       | Energy (eV) | Contribution (%) |       |       |                | Main bond type           |
|-------------------------------|-------------|------------------|-------|-------|----------------|--------------------------|
|                               |             | Re               | CO    | Cl    | L <sub>R</sub> |                          |
| L+4                           | -1.45       | 2.53             | 2.69  | 0.04  | 94.74          | $\pi^*(L_R)$             |
| L+3                           | -1.75       | 0.01             | 2.82  | 0.09  | 97.08          | $\pi^*(L_R)$             |
| L+2                           | -2.03       | 3.64             | 7.12  | 0.80  | 88.43          | $\pi^*(L_R)$             |
| L+1                           | -2.70       | -0.56            | 1.68  | 0.20  | 98.68          | $\pi^*(L_R)$             |
| L                             | -3.62       | 4.11             | 4.93  | 1.00  | 89.96          | $\pi^*(L_R)$             |
| HOMO-LUMO Energy gap(2.86 eV) |             |                  |       |       |                |                          |
| H                             | -6.48       | 47.62            | 24.27 | 24.03 | 4.09           | d(Re)+ $\pi$ (CO)+ p(Cl) |
| H-1                           | -6.51       | 47.34            | 23.16 | 25.33 | 4.17           | d(Re)+ $\pi$ (CO)+ p(Cl) |
| H-2                           | -6.54       | 48.20            | 21.77 | 25.29 | 4.73           | d(Re)+ $\pi$ (CO)+ p(Cl) |
| H-3                           | -6.68       | 41.18            | 18.12 | 34.28 | 6.42           | d(Re)+ $\pi$ (CO)+ p(Cl) |
| H-4                           | -7.05       | 68.47            | 30.45 | 0.62  | 0.46           | d(Re)+ $\pi$ (CO)        |
| H-5                           | -7.06       | 68.19            | 30.74 | 0.46  | 0.62           | d(Re)+ $\pi$ (CO)        |
| H-6                           | -7.14       | 0.26             | 0.08  | 2.95  | 96.71          | $\pi(L_R)$               |
| H-7                           | -7.63       | 3.00             | 1.69  | 30.81 | 64.49          | p(Cl) + $\pi(L_R)$       |
| H-8                           | -7.74       | 9.03             | 3.80  | 56.57 | 30.60          | p(Cl) + $\pi(L_R)$       |
| H-9                           | -7.84       | 14.89            | 6.67  | 70.44 | 8.00           | d(Re)+p(Cl)              |

**Table S6.** Frontier molecular orbital compositions (%) in the ground state for complex **3** at the B3LYP/BSII level.

| Orbital                       | Energy (eV) | Contribution (%) |       |       |                                                 | Main bond type              |
|-------------------------------|-------------|------------------|-------|-------|-------------------------------------------------|-----------------------------|
|                               |             | Re               | CO    | Cl    | L <sub>R</sub> -NH <sub>2</sub> NH <sub>2</sub> |                             |
| L+4                           | -1.41       | 2.52             | 2.82  | 0.03  | 94.62                                           | $\pi^*(L_R-NH_2NH_2)$       |
| L+3                           | -1.70       | 0.26             | 3.07  | 0.10  | 96.57                                           | $\pi^*(L_R-NH_2NH_2)$       |
| L+2                           | -1.99       | 3.78             | 7.40  | 0.80  | 88.02                                           | $\pi^*(L_R-NH_2NH_2)$       |
| L+1                           | -2.68       | -0.57            | 1.68  | 0.19  | 98.70                                           | $\pi^*(L_R-NH_2NH_2)$       |
| L                             | -3.60       | 4.12             | 4.94  | 0.99  | 89.96                                           | $\pi^*(L_R-NH_2NH_2)$       |
| HOMO-LUMO Energy gap(2.86 eV) |             |                  |       |       |                                                 |                             |
| H                             | -6.46       | 43.75            | 22.18 | 21.41 | 12.66                                           | d(Re)+ $\pi$ (CO)+ p(Cl)    |
| H-1                           | -6.49       | 46.45            | 22.82 | 24.24 | 6.49                                            | d(Re)+ $\pi$ (CO)+ p(Cl)    |
| H-2                           | -6.53       | 46.40            | 21.16 | 24.02 | 8.42                                            | d(Re)+ $\pi$ (CO)+ p(Cl)    |
| H-3                           | -6.61       | 6.61             | 3.11  | 5.31  | 84.98                                           | $\pi(L_R-NH_2NH_2)$         |
| H-4                           | -6.67       | 41.21            | 18.14 | 34.24 | 6.41                                            | d(Re) + p(Cl)               |
| H-5                           | -7.04       | 68.38            | 30.51 | 0.60  | 0.50                                            | d(Re)+ $\pi$ (CO)           |
| H-6                           | -7.05       | 68.22            | 30.73 | 0.45  | 0.60                                            | d(Re)+ $\pi$ (CO)           |
| H-7                           | -7.16       | 0.15             | 0.06  | 2.58  | 97.20                                           | $\pi(L_R-NH_2NH_2)$         |
| H-8                           | -7.65       | 4.33             | 2.25  | 37.98 | 55.45                                           | p(Cl) + $\pi(L_R-NH_2NH_2)$ |
| H-9                           | -7.72       | 8.39             | 3.62  | 55.40 | 32.59                                           | p(Cl) + $\pi(L_R-NH_2NH_2)$ |

**Table S7.** Frontier molecular orbital compositions (%) in the ground state for complex **6** at the B3LYP/BSII level.

| Orbital                       | Energy (eV) | Contribution (%) |       |       |                    | Main bond type                      |
|-------------------------------|-------------|------------------|-------|-------|--------------------|-------------------------------------|
|                               |             | Re               | CO    | Cl    | L <sub>R</sub> -ph |                                     |
| L+4                           | -1.59       | 0.95             | 1.95  | 0.03  | 97.07              | $\pi^*(\text{L}_R\text{-ph})$       |
| L+3                           | -1.97       | 3.23             | 6.20  | 0.57  | 90.01              | $\pi^*(\text{L}_R\text{-ph})$       |
| L+2                           | -2.42       | 0.71             | 1.76  | 0.00  | 97.53              | $\pi^*(\text{L}_R\text{-ph})$       |
| L+1                           | -2.79       | -0.22            | 1.94  | 0.32  | 97.95              | $\pi^*(\text{L}_R\text{-ph})$       |
| L                             | -3.59       | 3.60             | 4.45  | 0.87  | 91.08              | $\pi^*(\text{L}_R\text{-ph})$       |
| HOMO-LUMO Energy gap(2.90 eV) |             |                  |       |       |                    |                                     |
| H                             | -6.49       | 47.67            | 23.86 | 24.37 | 4.10               | d(Re)+ $\pi$ (CO)+ p(Cl)            |
| H-1                           | -6.50       | 46.43            | 22.78 | 24.38 | 6.41               | d(Re)+ $\pi$ (CO)+ p(Cl)            |
| H-2                           | -6.54       | 47.32            | 21.58 | 25.00 | 6.11               | d(Re)+ $\pi$ (CO)+ p(Cl)            |
| H-3                           | -6.66       | 39.99            | 17.84 | 32.10 | 10.07              | d(Re)+ $\pi$ (CO)+ p(Cl)            |
| H-4                           | -6.96       | 2.60             | 1.10  | 5.86  | 90.44              | $\pi(\text{L}_R\text{-ph})$         |
| H-5                           | -7.05       | 68.44            | 30.46 | 0.53  | 0.57               | d(Re)+ $\pi$ (CO)                   |
| H-6                           | -7.07       | 68.46            | 30.69 | 0.59  | 0.26               | d(Re)+ $\pi$ (CO)                   |
| H-7                           | -7.51       | 0.57             | 0.39  | 17.43 | 81.61              | $\pi(\text{L}_R\text{-ph})$         |
| H-8                           | -7.73       | 7.71             | 3.47  | 51.69 | 37.12              | p(Cl) + $\pi(\text{L}_R\text{-ph})$ |
| H-9                           | -7.82       | 12.16            | 4.77  | 56.24 | 26.82              | p(Cl) + $\pi(\text{L}_R\text{-ph})$ |

**Table S8.** Frontier molecular orbital compositions (%) in the ground state for complex **7** at the B3LYP/BSII level.

| Orbital                       | Energy (eV) | Contribution (%) |       |       |                                 | Main bond type                                 |
|-------------------------------|-------------|------------------|-------|-------|---------------------------------|------------------------------------------------|
|                               |             | Re               | CO    | Cl    | L <sub>R</sub> -NH <sub>2</sub> |                                                |
| L+4                           | -1.46       | 3.01             | 4.37  | 0.08  | 92.54                           | $\pi^*(\text{L}_R\text{-NH}_2)$                |
| L+3                           | -1.87       | 3.01             | 6.43  | 0.55  | 90.01                           | $\pi^*(\text{L}_R\text{-NH}_2)$                |
| L+2                           | -2.30       | 0.85             | 2.01  | 0.03  | 97.11                           | $\pi^*(\text{L}_R\text{-NH}_2)$                |
| L+1                           | -2.65       | -0.40            | 1.80  | 0.28  | 98.31                           | $\pi^*(\text{L}_R\text{-NH}_2)$                |
| L                             | -3.46       | 3.60             | 4.63  | 0.87  | 90.90                           | $\pi^*(\text{L}_R\text{-NH}_2)$                |
| HOMO-LUMO Energy gap(2.71 eV) |             |                  |       |       |                                 |                                                |
| H                             | -6.17       | 2.23             | 1.24  | 0.89  | 95.63                           | $\pi(\text{L}_R\text{-NH}_2)$                  |
| H-1                           | -6.45       | 47.77            | 24.04 | 24.26 | 3.94                            | $d(\text{Re}) + \pi(\text{CO}) + p(\text{Cl})$ |
| H-2                           | -6.47       | 46.71            | 23.13 | 24.91 | 5.26                            | $d(\text{Re}) + \pi(\text{CO}) + p(\text{Cl})$ |
| H-3                           | -6.51       | 47.73            | 21.84 | 25.12 | 5.31                            | $d(\text{Re}) + \pi(\text{CO}) + p(\text{Cl})$ |
| H-4                           | -6.65       | 39.98            | 17.71 | 33.26 | 9.05                            | $d(\text{Re}) + \pi(\text{CO}) + p(\text{Cl})$ |
| H-5                           | -7.01       | 68.54            | 30.49 | 0.60  | 0.36                            | $d(\text{Re}) + \pi(\text{CO})$                |
| H-6                           | -7.02       | 68.29            | 30.92 | 0.46  | 0.33                            | $d(\text{Re}) + \pi(\text{CO})$                |
| H-7                           | -7.32       | -0.04            | 0.15  | 5.63  | 94.27                           | $\pi(\text{L}_R\text{-NH}_2)$                  |
| H-8                           | -7.53       | 1.50             | 0.88  | 32.55 | 65.08                           | $p(\text{Cl}) + \pi(\text{L}_R\text{-NH}_2)$   |
| H-9                           | -7.72       | 8.63             | 3.71  | 53.14 | 34.52                           | $p(\text{Cl}) + \pi(\text{L}_R\text{-NH}_2)$   |

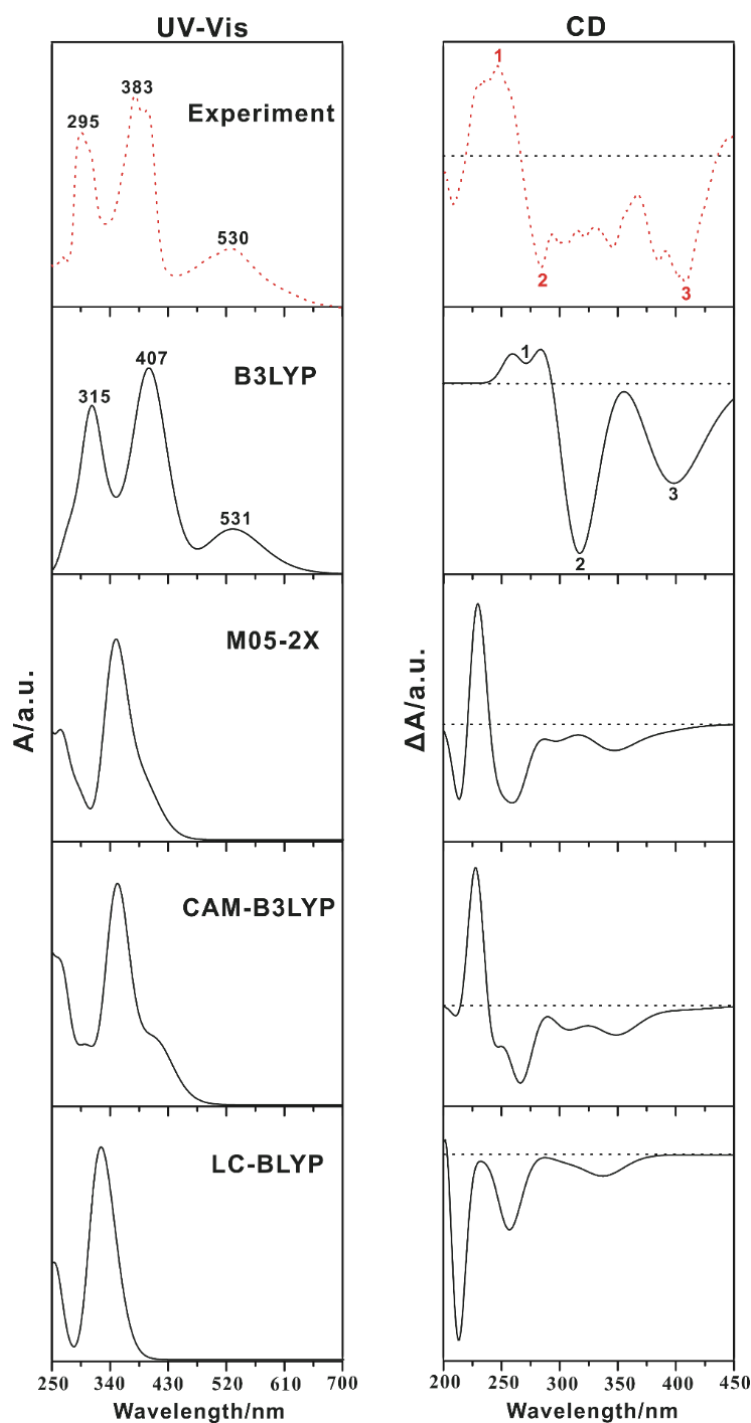

**Figure S4.** Calculated UV-Vis and CD spectra of complex **2** using four different DFT functionals along with the experimental spectra in solution phase. Data to prepare the experimental spectra were taken from ref.34.

It is well known that conventional TDDFT methods usually underestimate charge-transfer excitations due to semi-local exchange correlation effects. Studies have shown that range-separated functionals (e.g. LC-BLYP and CAM-B3LYP) can accurately describe electron excitation properties and calculate HOMO–LUMO gaps, and ionization/electron affinity energies. Moreover, the range-separated functionals have successfully described the optoelectronic and excitonic properties of oligoacenes.

Thus, we selected the both conventional and range-separated DFT functionals as follows: B3LYP, M05-2X, CAM-B3LYP, LC-BLYP to evaluate the influence of these DFT functionals on UV-Vis and CD spectra. The results show that the computed absorption wavelengths strongly depend on the used functionals. The M05-2X, CAM-B3LYP and LC-BLYP functionals could not reproduce the experimental absorption band at about 530 nm. The same blue-shifted trend was also observed in simulated CD spectra, especially for the LC-BLYP functional, the band 1 of the CD spectra is a negative Cotton effect. These observation might result from the larger energy gaps of the three functionals (CAM-B3LYP, LC-BLYP and M05-2X). However, the results computed with the B3LYP functional are much closer to the experimental results.

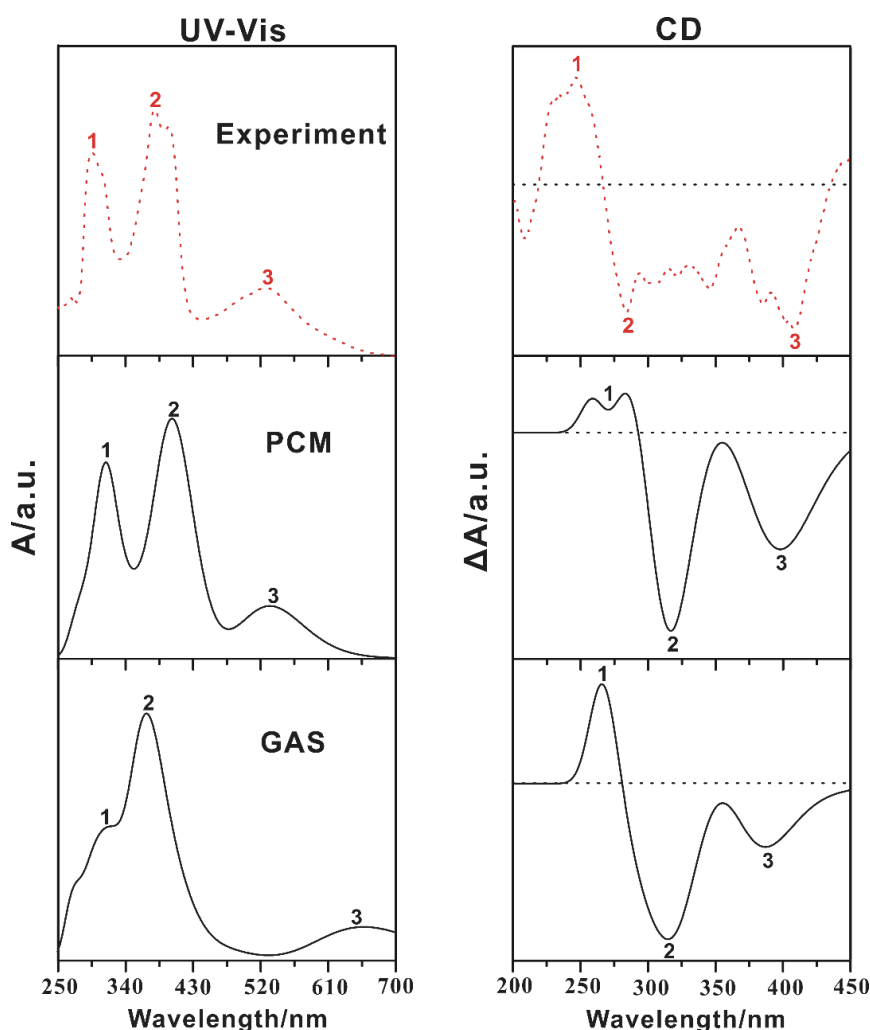

**Figure S5.** Calculated UV-Vis (left) and CD (right) spectra in both gas and solution phases for complex **2** at the TDB3LYP/ BSII (BSIII for metal Re) level along with experimental spectra. Data to prepare the experimental spectra were taken from ref.34.

**Table S9.** The calculated excitation energies, oscillator strengths and rotational strengths for complex **2** in the solution phase at the TDB3LYP/ BSII (BSIII for metal Re) level.

| states | eV     | $\lambda^a$ | $f^b$  | Rlength <sup>c</sup> | Rvelocity <sup>c</sup> |
|--------|--------|-------------|--------|----------------------|------------------------|
| 1      | 2.1781 | 569.22      | 0.0010 | -0.0377              | 0.0062                 |
| 2      | 2.1982 | 564.02      | 0.0000 | 0.0324               | -0.1422                |
| 3      | 2.3366 | 530.63      | 0.1822 | -0.1702              | -0.0913                |
| 4      | 2.4730 | 501.36      | 0.0000 | -0.2585              | -0.2664                |
| 5      | 2.7161 | 456.48      | 0.0000 | 0.1489               | 0.1161                 |
| 6      | 2.7245 | 455.06      | 0.0005 | 0.2612               | 0.2692                 |
| 7      | 3.0428 | 407.47      | 0.4986 | -2.6274              | -3.0633                |
| 8      | 3.1090 | 398.79      | 0.1212 | -4.2194              | -3.7821                |
| 9      | 3.1208 | 397.28      | 0.0004 | 0.6364               | 0.7249                 |
| 10     | 3.1895 | 388.72      | 0.2555 | -7.9679              | -5.6177                |
| 11     | 3.3105 | 374.52      | 0.0000 | -0.1113              | -0.0973                |
| 12     | 3.4462 | 359.77      | 0.0004 | 0.6628               | 0.5241                 |
| 13     | 3.5036 | 353.87      | 0.0865 | 2.4550               | 2.3009                 |
| 14     | 3.5642 | 347.86      | 0.0972 | -0.4565              | -0.3786                |
| 15     | 3.6507 | 339.62      | 0.0000 | -0.2586              | -0.2007                |
| 16     | 3.6584 | 338.90      | 0.0021 | 0.1490               | 0.2313                 |
| 17     | 3.6903 | 335.97      | 0.0001 | -0.0708              | -0.0446                |
| 18     | 3.8033 | 325.99      | 0.0002 | -3.0595              | -3.0692                |
| 19     | 3.8476 | 322.24      | 0.0001 | 2.5885               | 2.5268                 |
| 20     | 3.8799 | 319.55      | 0.1325 | 5.1682               | 4.4824                 |
| 21     | 3.9252 | 315.87      | 0.0010 | 2.8147               | 2.5226                 |
| 22     | 3.9310 | 315.40      | 0.2493 | -28.9511             | -26.3036               |
| 23     | 4.0130 | 308.96      | 0.0081 | 5.2493               | 3.8625                 |
| 24     | 4.0257 | 307.98      | 0.2584 | 4.1819               | 3.7324                 |
| 25     | 4.0880 | 303.29      | 0.0006 | -2.4498              | -2.6568                |
| 26     | 4.1487 | 298.85      | 0.0001 | 2.2214               | 2.2777                 |
| 27     | 4.1521 | 298.61      | 0.0119 | -3.5708              | -3.5261                |
| 28     | 4.1951 | 295.54      | 0.0002 | -4.0700              | -4.1235                |
| 29     | 4.2022 | 295.05      | 0.0337 | 18.6915              | 18.9625                |
| 30     | 4.2186 | 293.90      | 0.0259 | -23.9861             | -25.2799               |
| 31     | 4.2215 | 293.69      | 0.0024 | 5.3776               | 5.8957                 |
| 32     | 4.2273 | 293.29      | 0.0046 | -9.5752              | -9.9228                |
| 33     | 4.2380 | 292.56      | 0.0165 | 14.9609              | 15.2077                |
| 34     | 4.2771 | 289.88      | 0.0111 | 0.7766               | 0.6022                 |
| 35     | 4.2898 | 289.02      | 0.0000 | 0.0575               | -0.0586                |
| 36     | 4.2964 | 288.58      | 0.0022 | -0.0420              | -0.1839                |
| 37     | 4.3219 | 286.87      | 0.0002 | -1.1836              | -1.3155                |
| 38     | 4.3370 | 285.87      | 0.0003 | -0.1913              | -0.3266                |



---

|    |        |        |        |         |         |
|----|--------|--------|--------|---------|---------|
| 39 | 4.3427 | 285.50 | 0.0003 | -1.1516 | -1.1168 |
| 40 | 4.3564 | 284.60 | 0.0063 | 5.5338  | 5.0699  |
| 41 | 4.3737 | 283.48 | 0.0000 | -0.3406 | -0.3092 |
| 42 | 4.3879 | 282.56 | 0.0575 | 7.7619  | 7.9637  |
| 43 | 4.4286 | 279.96 | 0.0010 | -6.3918 | -5.8940 |
| 44 | 4.4572 | 278.17 | 0.0058 | -1.1220 | -1.0756 |
| 45 | 4.4938 | 275.90 | 0.0513 | 3.3075  | 3.3502  |
| 46 | 4.4998 | 275.53 | 0.0000 | -0.1652 | -0.1780 |
| 47 | 4.5268 | 273.89 | 0.0045 | -0.9497 | -1.0826 |
| 48 | 4.5406 | 273.05 | 0.0000 | 0.5916  | 0.6352  |
| 49 | 4.5747 | 271.02 | 0.0003 | -8.8468 | -8.5337 |
| 50 | 4.5896 | 270.14 | 0.0448 | 0.4046  | 0.1270  |
| 51 | 4.6075 | 269.09 | 0.0000 | 3.3847  | 3.3173  |
| 52 | 4.6464 | 266.84 | 0.0001 | -0.4578 | -0.5859 |
| 53 | 4.6503 | 266.62 | 0.0002 | -4.6057 | -5.0510 |
| 54 | 4.6596 | 266.08 | 0.0008 | 4.6831  | 4.6358  |
| 55 | 4.6748 | 265.22 | 0.0000 | 3.6345  | 3.8033  |
| 56 | 4.7034 | 263.61 | 0.0047 | 0.1242  | 0.1937  |
| 57 | 4.7117 | 263.14 | 0.0001 | 0.6156  | 0.7680  |
| 58 | 4.7376 | 261.70 | 0.0000 | 0.0347  | -0.0130 |
| 59 | 4.7413 | 261.50 | 0.0039 | 0.4716  | 0.3445  |
| 60 | 4.7920 | 258.73 | 0.0000 | -0.0803 | -0.0189 |

---

<sup>a</sup> $\lambda$  in nm. <sup>b</sup> Oscillator Strengths. <sup>c</sup> R values (in  $10^{-40}$  esu<sup>2</sup>cm<sup>2</sup>) using the velocity-gauge representation and length-gauge representation of the electric dipole operator.

**Table S10.** Computed energies/wavelengths (nm), oscillator strengths ( $f$ ), major contribution and the assignments for complexes **3-9** at TDB3LYP/ BSII (BSIII for metal Re) level.

| Complex  | State | $E(\text{eV})$ | $\lambda_{\text{cal}}(\text{nm})$ | $f$   | Major contribution             | Assignments                        |
|----------|-------|----------------|-----------------------------------|-------|--------------------------------|------------------------------------|
| <b>3</b> | S3    | 2.35           | 528.61                            | 0.187 | H-2→L (91%)                    | MLCT/LLCT/ XLCT                    |
|          | S8    | 3.08           | 403.14                            | 0.336 | H-7→L (66%)                    | ILCT                               |
|          | S24   | 3.97           | 312.07                            | 0.223 | H→L+1 (18%)<br>H-7→L+1 (77%)   | MLCT/LLCT/ XLCT<br>ILCT            |
| <b>4</b> | S3    | 2.25           | 550.73                            | 0.164 | H-2→L (64%)<br>H-1→L (27%)     | MLCT/LLCT/ XLCT<br>MLCT/LLCT/ XLCT |
|          | S13   | 3.06           | 404.99                            | 0.232 | H-6→L (37%)<br>H-2→L+3 (24%)   | ILCT<br>MLCT/LLCT/ XLCT            |
|          | S42   | 4.01           | 309.14                            | 0.325 | H-6→L+3 (63%)                  | ILCT                               |
| <b>5</b> | S3    | 2.26           | 549.29                            | 0.165 | H-2→L (41%)<br>H-1→L (39%)     | MLCT/LLCT/ XLCT<br>MLCT/LLCT/ XLCT |
|          | S18   | 3.13           | 395.84                            | 0.138 | H-2→L+2 (22%)<br>H-7→L (21%)   | MLCT/LLCT/ XLCT<br>ILCT            |
|          | S48   | 4.07           | 304.96                            | 0.280 | H-7→L+3 (78%)                  | ILCT                               |
| <b>6</b> | S3    | 2.37           | 523.33                            | 0.156 | H-2→L (92%)                    | MLCT/LLCT/ XLCT                    |
|          | S7    | 2.92           | 424.59                            | 0.649 | H-4→L (89%)                    | ILCT                               |
|          | S21   | 3.69           | 336.24                            | 0.184 | H-4→L+1 (60%)<br>H-10→L (18%)  | ILCT<br>XLCT                       |
|          | S33   | 4.19           | 296.23                            | 0.210 | H-7→L+1 (74%)                  | ILCT                               |
| <b>7</b> | S3    | 2.37           | 522.23                            | 0.482 | H→L (69%)                      | ILCT                               |
|          | S17   | 3.61           | 343.17                            | 0.084 | H-3→L+2 (63%)<br>H-4→L+2 (21%) | MLCT/LLCT/ XLCT<br>MLCT/LLCT/ XLCT |
|          | S47   | 4.45           | 278.31                            | 0.064 | H-9→L+1 (37%)<br>H-3→L+4 (12%) | ILCT/ XLCT<br>MLCT/LLCT/ XLCT      |
| <b>8</b> | S3    | 2.19           | 566.33                            | 0.113 | H-2→L (63%)<br>H-1→L (30%)     | MLCT/LLCT/ XLCT<br>MLCT/LLCT/ XLCT |
|          | S10   | 2.91           | 426.09                            | 0.506 | H-6→L (48%)                    | ILCT                               |
|          | S38   | 4.03           | 307.88                            | 0.177 | H-3→L+1 (41%)                  | MLCT/LLCT/ XLCT                    |
|          |       |                |                                   |       | H-1→L+4 (34%)<br>H-6→L+3 (22%) | MLCT/LLCT/ XLCT<br>ILCT            |
| <b>9</b> | S4    | 2.37           | 523.50                            | 0.158 | H-3→L (65%)<br>H-3→L+1 (18%)   | MLCT/LLCT/ XLCT<br>MLCT/LLCT/ XLCT |
|          | S35   | 3.69           | 336.32                            | 0.206 | H-10→L (22%)                   | ILCT                               |
|          |       |                |                                   |       | H-7→L+1 (21%)                  | ILCT                               |

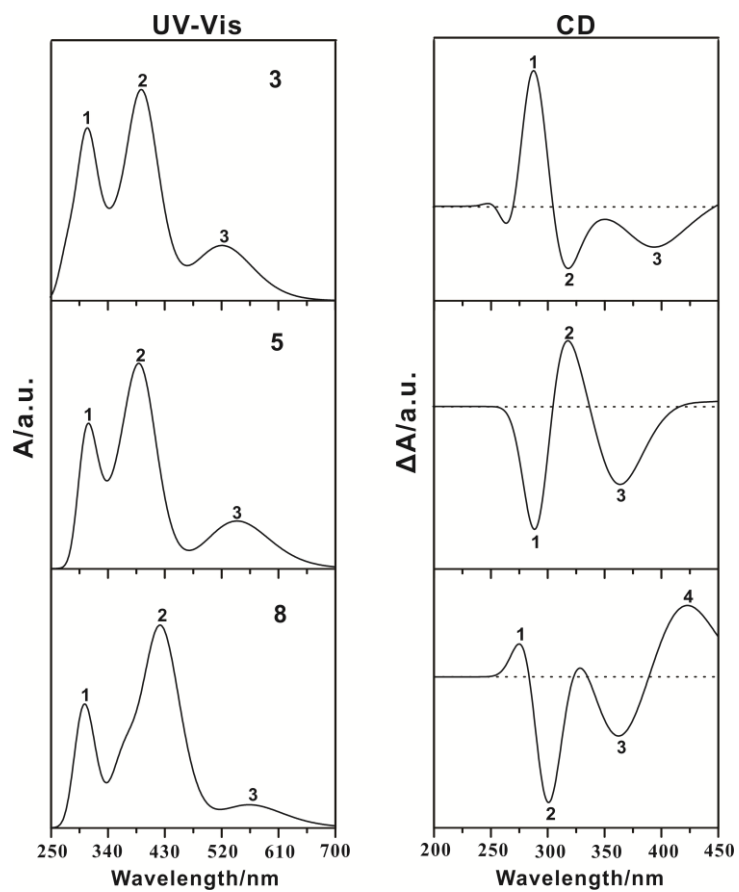

**Figure S6.** Calculated UV-Vis (left) and CD (right) spectra in the solution phase for complexes **3**, **5** and **8**.

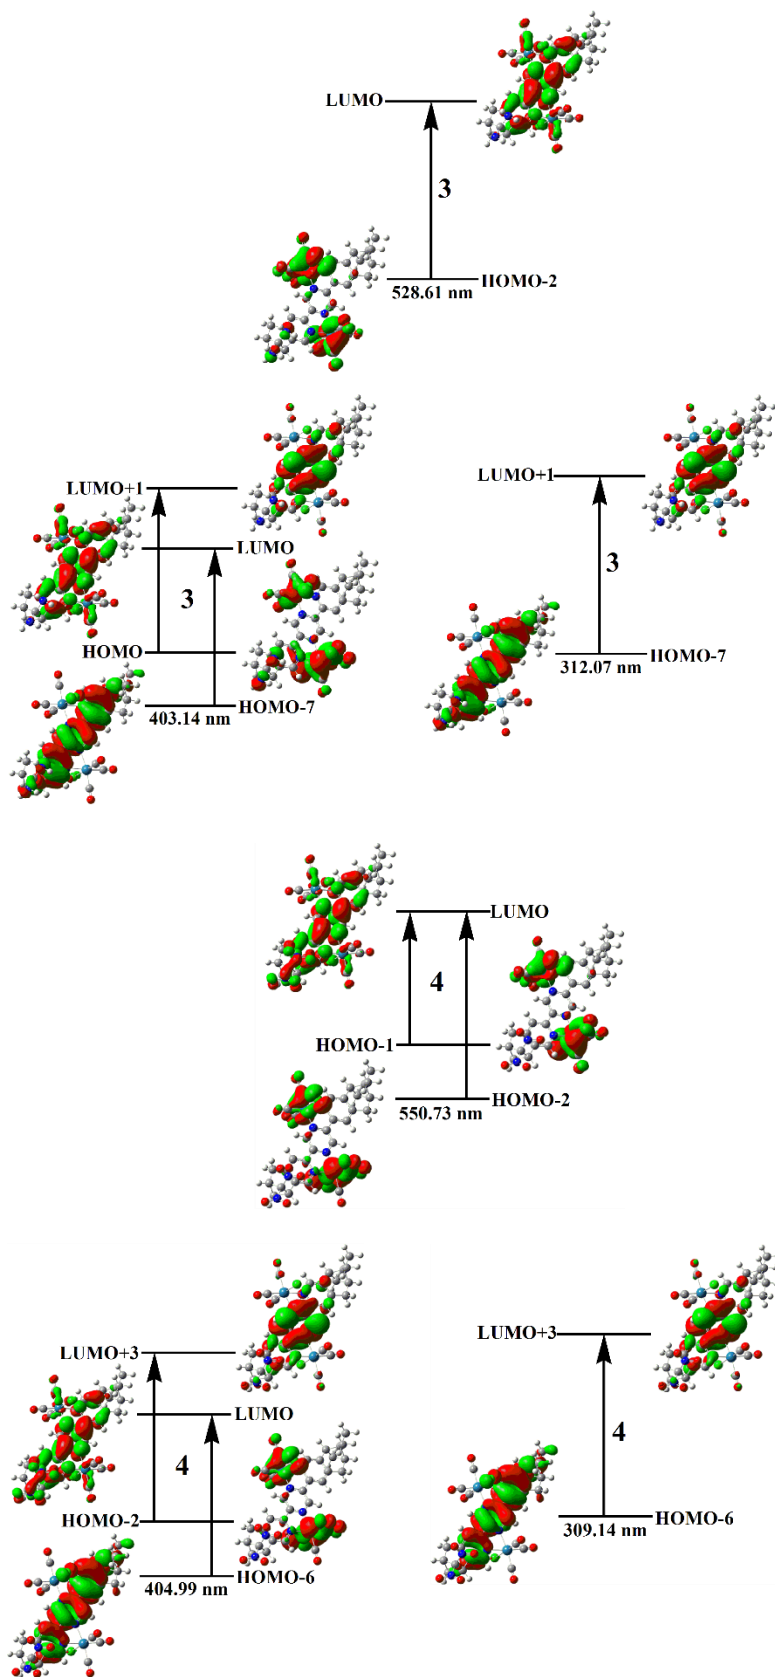

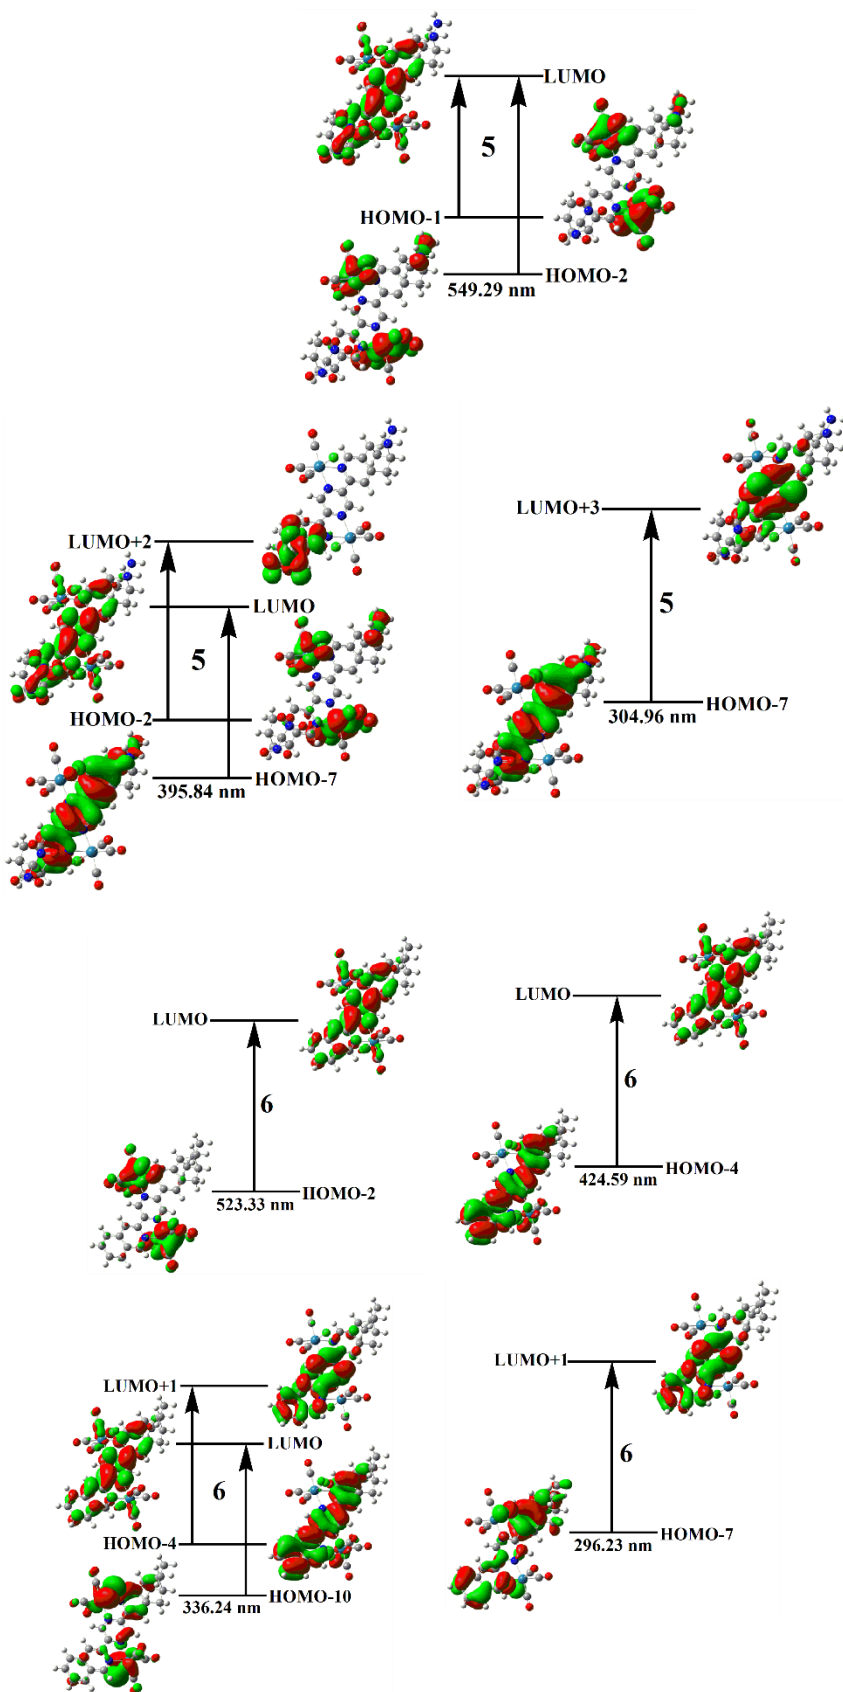

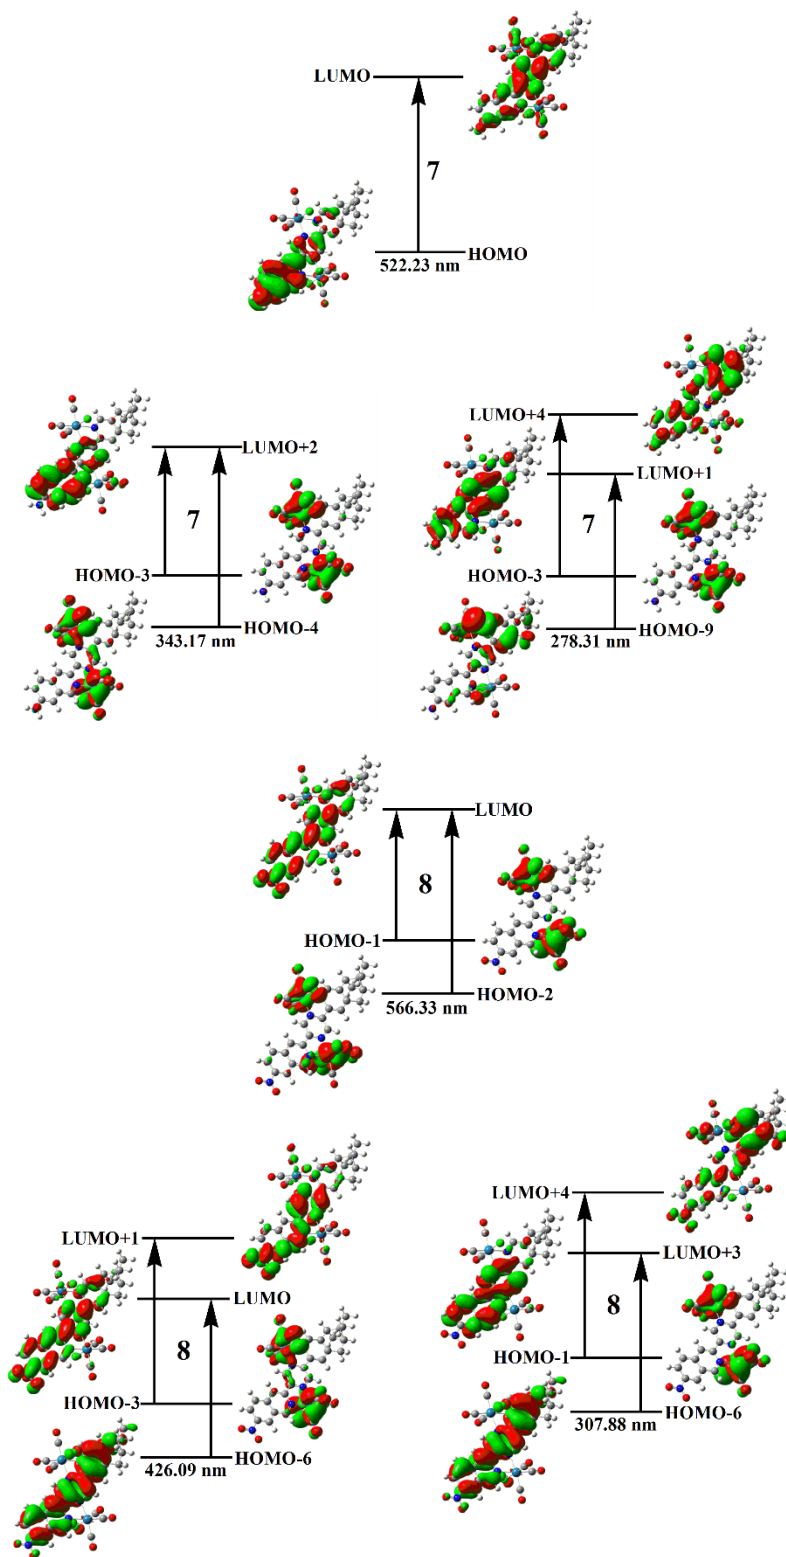

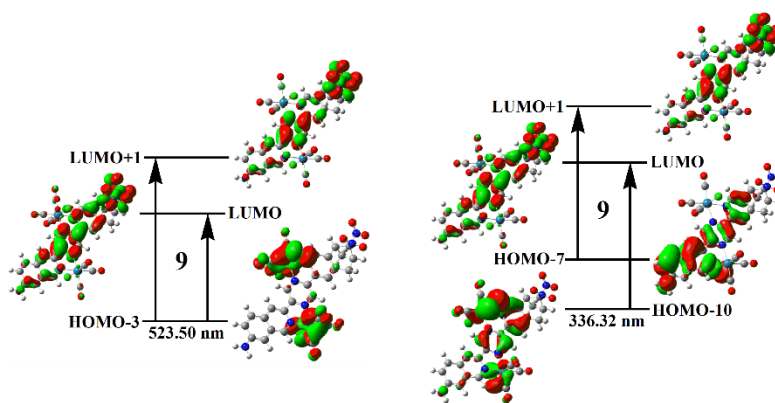

**Figure S7.** Molecular orbital isosurfaces involved in the main electron transitions of complexes **3-9** at the TDB3LYP/ BSII (BSIII for metal Re) level of theory.

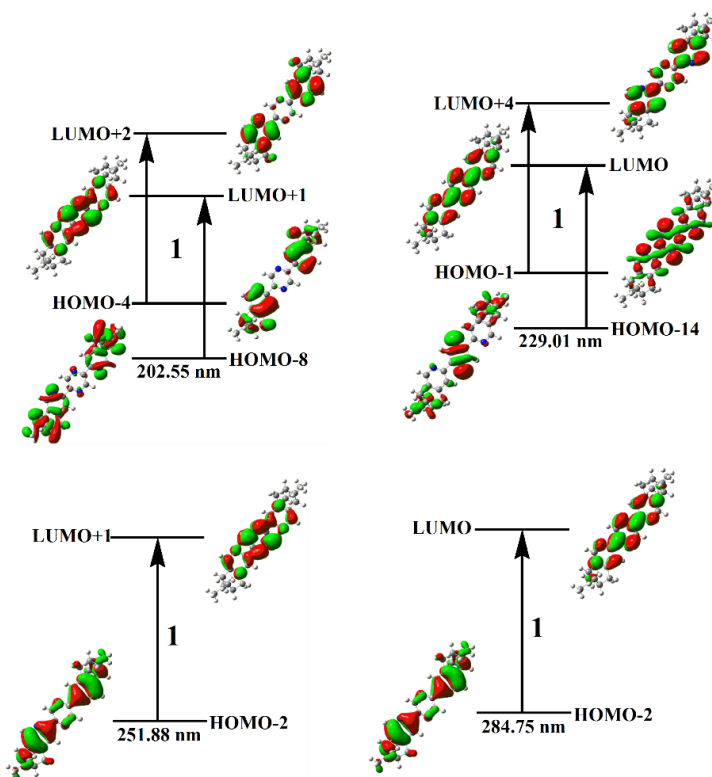

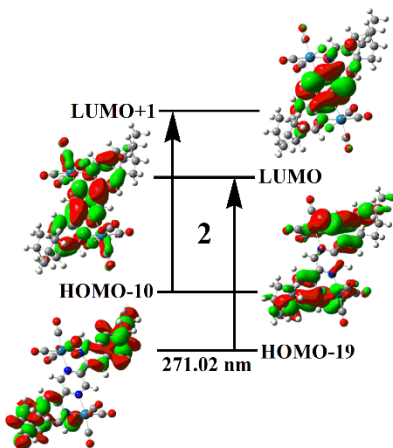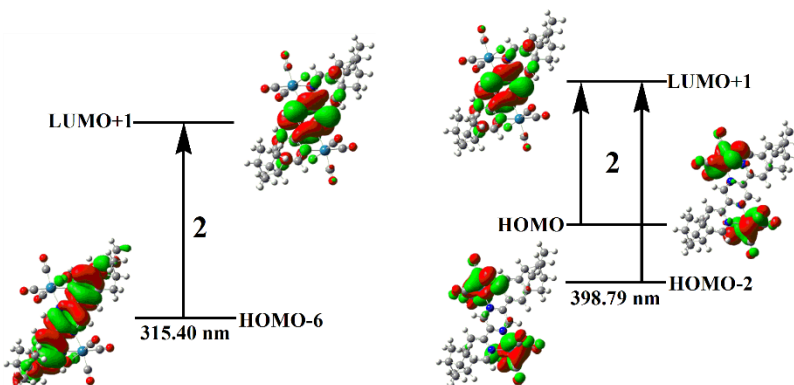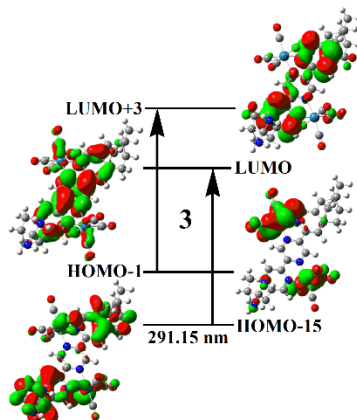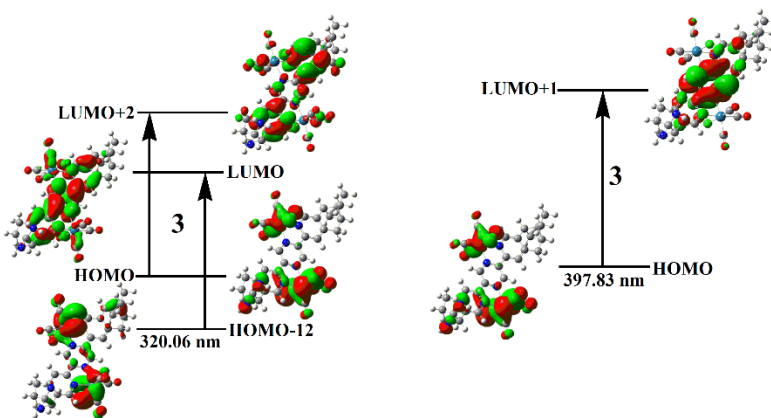



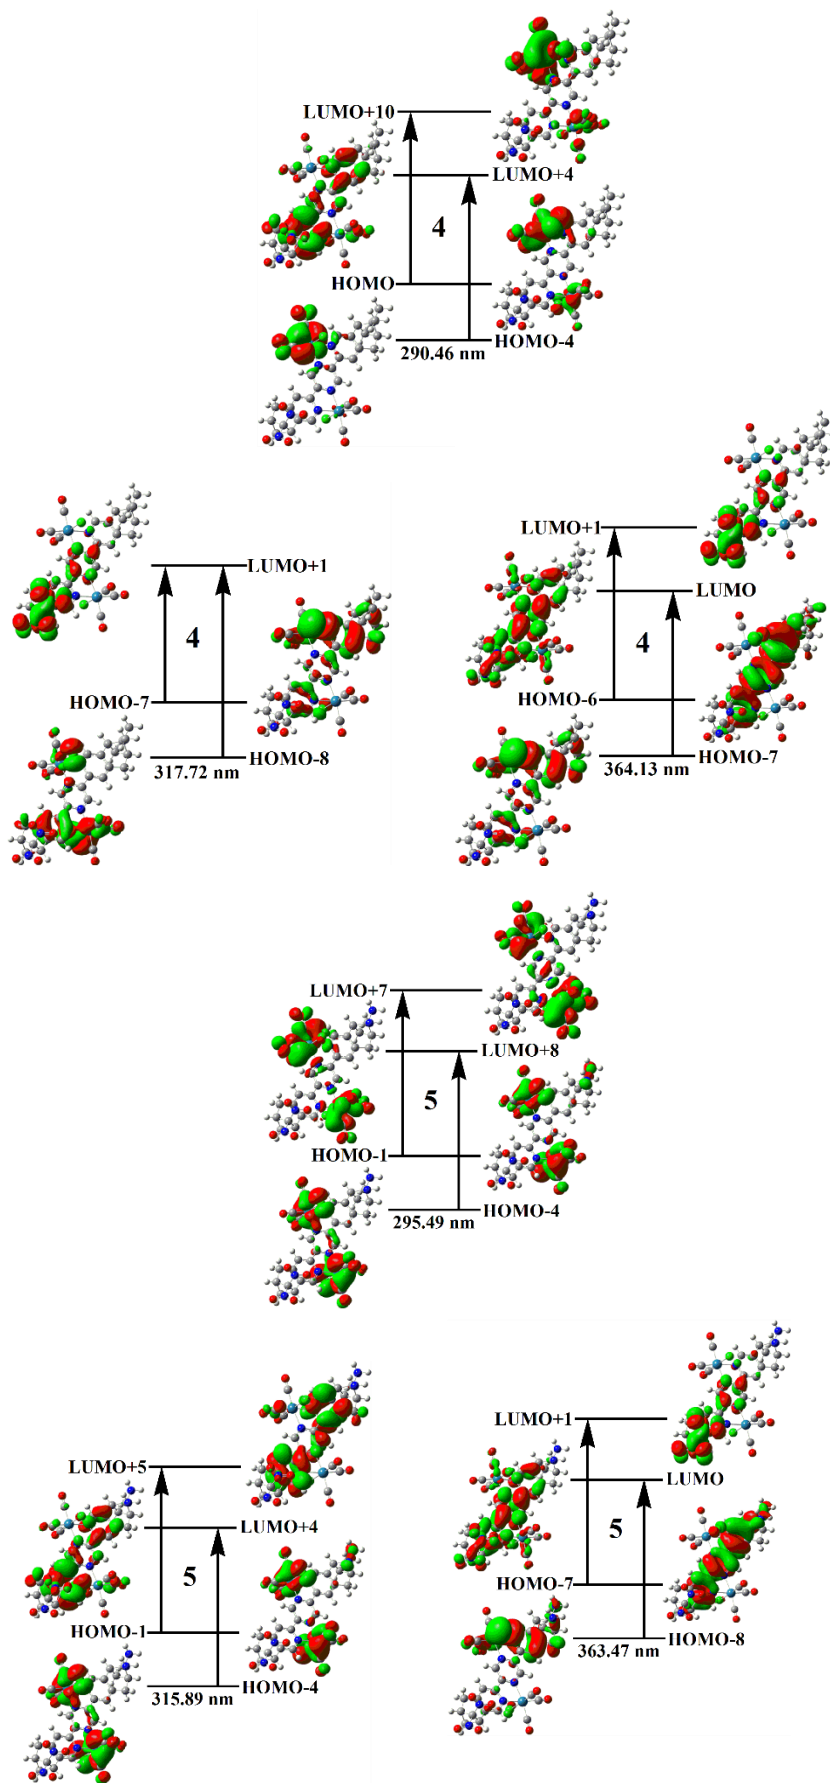

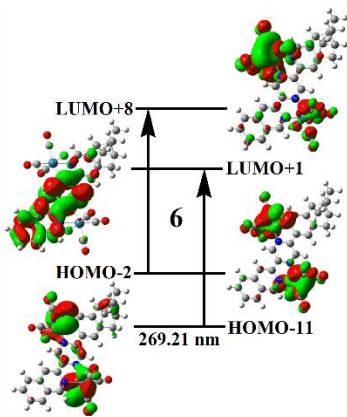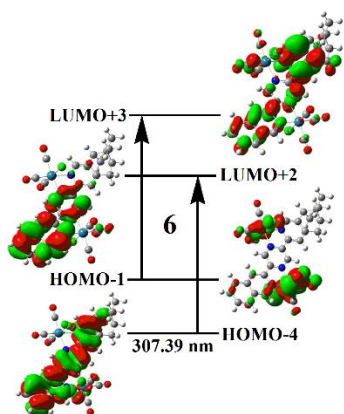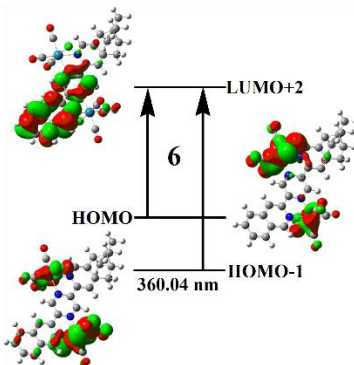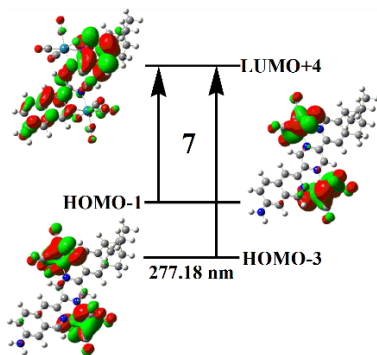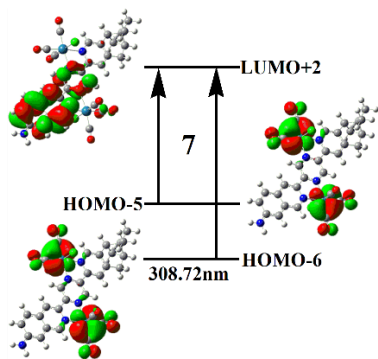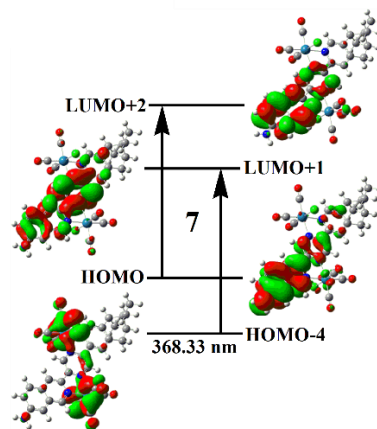

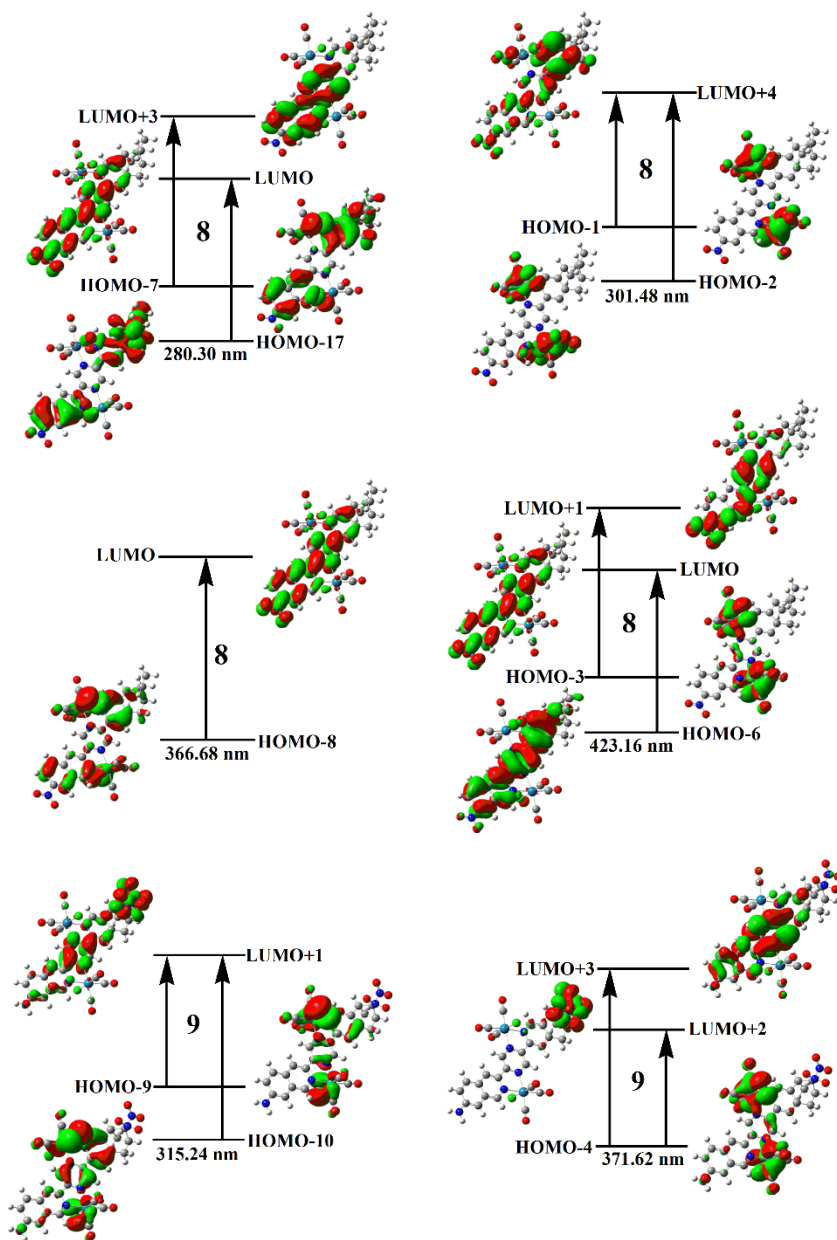

**Figure S8.** Molecular orbitals involved into the main CD transition of ligand **1**, complexes **2-9**.
